# Supplementary material for: Caspase 9-induced apoptosis enables efficient fetal cell ablation and disease modeling
Source: Springer Nature journal article supplement (doi:10.1038/s41467-025-57795-6), 2025-03-15
Supplement: MOESM1 [file 41467_2025_57795_MOESM1_ESM.pdf]

## **Caspase 9-induced apoptosis enables efficient fetal cell ablation and disease modeling**

Kenji Matsui<sup>1</sup>, Masahito Watanabe<sup>2†</sup>, Shutaro Yamamoto<sup>1,3</sup>, Shiho Kawagoe<sup>1</sup>, Takumi Ikeda<sup>1</sup>, Hinari Ohashi<sup>1</sup>, Takafumi Kuroda<sup>1</sup>, Nagisa Koda<sup>1</sup>, Keita Morimoto<sup>1</sup>, Yoshitaka Kinoshita<sup>1,4</sup>, Yuka Inage<sup>1,5</sup>, Yatsumu Saito<sup>1</sup>, Shohei Fukunaga<sup>1</sup>, Toshinari Fujimoto<sup>1</sup>, Susumu Tajiri<sup>1</sup>, Kei Matsumoto<sup>1</sup>, Eiji Kobayashi<sup>6</sup>, Takashi Yokoo<sup>1\*</sup> and Shuichiro Yamanaka<sup>1,7\*</sup>

<sup>1</sup>Division of Nephrology and Hypertension, Department of Internal Medicine, The Jikei University School of Medicine, Nishi-Shimbashi 3-25-8, Minato-ku, 105-8461 Tokyo, Japan.

<sup>2</sup>Meiji University International Institute for Bio-Resource Research, Higashimita 1-1-1, Tama-ku, Kawasaki, 214-8571 Kanagawa, Japan.

<sup>3</sup>Department of Urology, The Jikei University School of Medicine, Nishi-Shimbashi 3-25-8, Minato-ku, 105-8461 Tokyo, Japan

<sup>4</sup>Department of Urology, Graduate School of Medicine, The University of Tokyo, Hongo 7-3-1, Bunkyo-ku, 113-0033 Tokyo, Japan.

<sup>5</sup>Department of Pediatrics, The Jikei University School of Medicine, Nishi-Shimbashi 3-25-8, Minato-ku, 105-8461 Tokyo, Japan

<sup>6</sup>Department of Kidney Regenerative Medicine, The Jikei University School of Medicine, Nishi-Shimbashi 3-25-8, Minato-ku, 105-8461 Tokyo, Japan

<sup>7</sup>Kidney Applied Regenerative Medicine, Project Research Units, The Jikei University School of Medicine, Nishi-Shimbashi 3-25-8, Minato-ku, 105-8461 Tokyo, Japan.

†Present affiliation: PorMedTec Co., Ltd., 2-3227 Mita, Tama-ku, Kawasaki, 214-0034 Kanagawa, Japan

\*Corresponding authors, [shu.yamanaka@jikei.ac.jp](mailto:shu.yamanaka@jikei.ac.jp); [tyokoo@jikei.ac.jp](mailto:tyokoo@jikei.ac.jp)

## Table of Contents

- Supplementary Fig. 1 | Validation of the iC9 vector and diagnosis of Six2-iC9 mice.
- Supplementary Fig. 2 | The effect of CID on wild-type fetuses.
- Supplementary Fig. 3 | Neonatal wild-type mice kidneys.
- Supplementary Fig. 4 | Analysis of a chronic kidney disease model by CID administration during a fetal period.
- Supplementary Fig. 5 | NPC ablation in homozygous neonatal kidneys.
- Supplementary Fig. 6 | Fetal mice kidney culture on the air–liquid interface.
- Supplementary Fig. 7 | Slow apoptosis induction in Six2-DTA mice.
- Supplementary Fig. 8 | Ineffective NPC ablation with CID in fetal heterozygous kidneys.
- Supplementary Fig. 9 | Evaluation of protein expression levels of using capillary Western immunoassay.
- Supplementary Fig. 10 | Cell ablation induction in dissociated and re-aggregated fetal Six2-iC9<sup>+/+</sup> kidney cell spheres.
- Supplementary Fig. 11 | NPC ablation in heterozygous neonatal kidneys by co-administration of XIAP inhibitor and CID.
- Supplementary Fig. 12 | Replacement and maturation of nephron progenitor cells using fetal Six2-iC9 kidneys as a scaffold.
- Supplementary Fig. 13 | Purity and differentiation capacity of induced human NPCs.
- Supplementary Fig. 14 | Comparison of the size of regenerated nephrons between humans and mice.
- Supplementary Fig. 15 | A schematic illustrating this study.
- Supplementary Fig. 16 | An uncropped scan of all blots in Supplementary Fig. 1c.
- Supplementary Table 1 | The primer sequences for genomic PCR.
- Supplementary Table 2 | List of primary antibodies for immunostaining.
- Supplementary Table 3 | List of primary antibodies for capillary Western immunoassay.
- Supplementary Table 4 | List of TaqMan Gene Expression Assays for RT-qPCR.

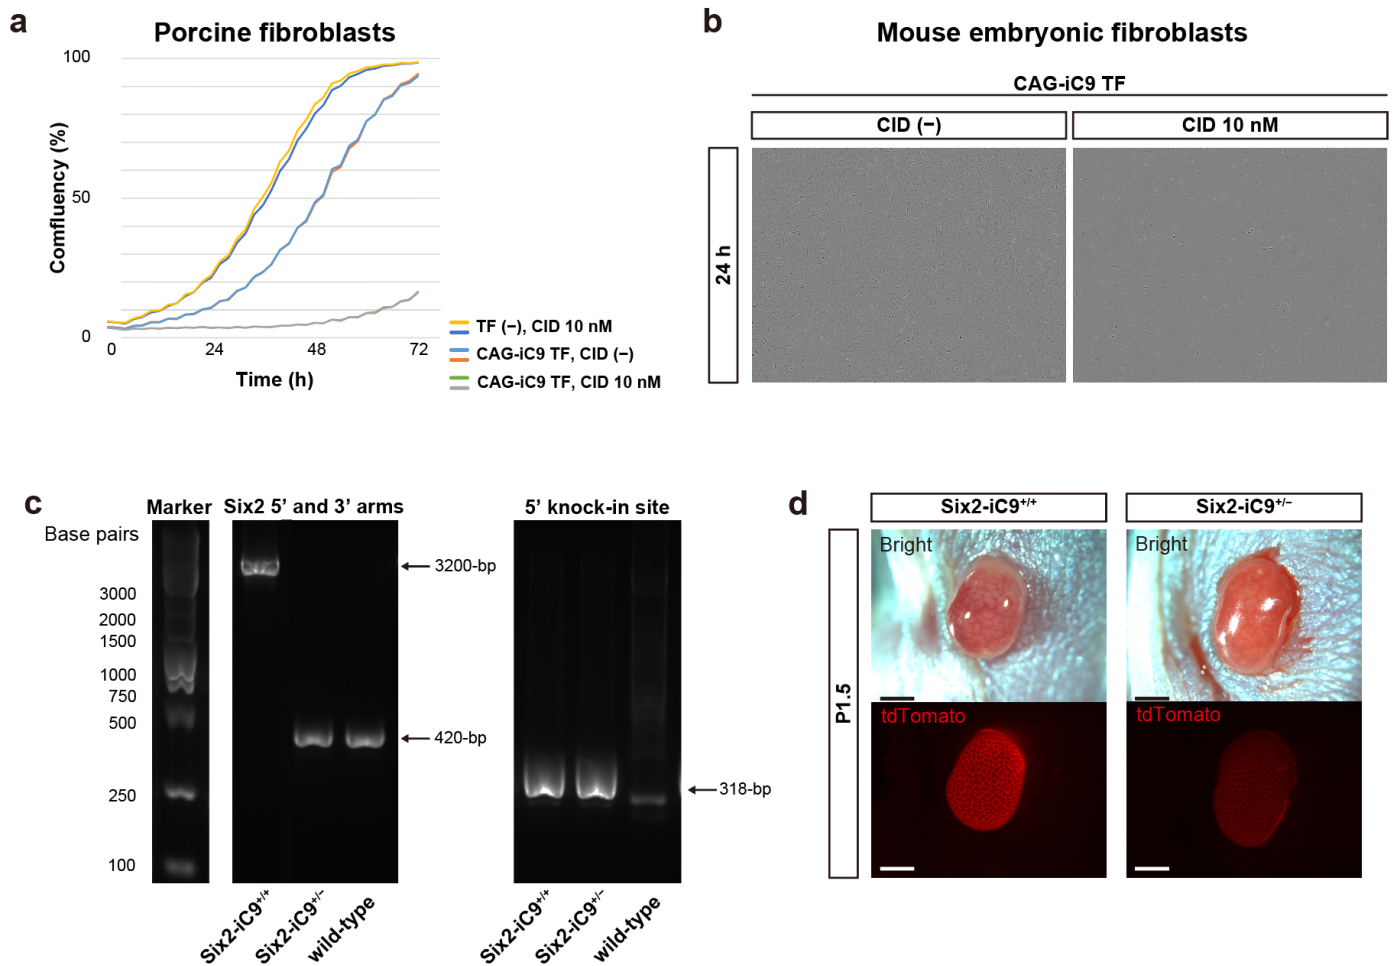

### Supplementary Fig. 1 | Validation of the iC9 vector and diagnosis of Six2-iC9 mice.

**a** Confluency of porcine fibroblasts cultured over time after transfection with the CAG-iC9 vector. Cell proliferation is inhibited when 10 nM CID was added to the transfected fibroblasts. **b** Phase-contrast images of mouse embryonic fibroblasts cultured for 24 hours after transfection with the CAG-iC9 vector. **c** Representative data of genomic PCR to differentiate Six2-iC9<sup>+/+</sup> (homozygous), Six2-iC9<sup>+/-</sup> (heterozygous), and wild-type mice. **d** Fluorescence stereomicroscopic images of exposed left kidneys of Six2-iC9<sup>+/+</sup> and Six2-iC9<sup>+/-</sup> neonates on postnatal day 1.5 (P1.5) under the same imaging conditions, showing tdTomato<sup>+</sup> NPCs. Scale bars, 1 mm. CID, chemical inducer of dimerization; TF, transfection.

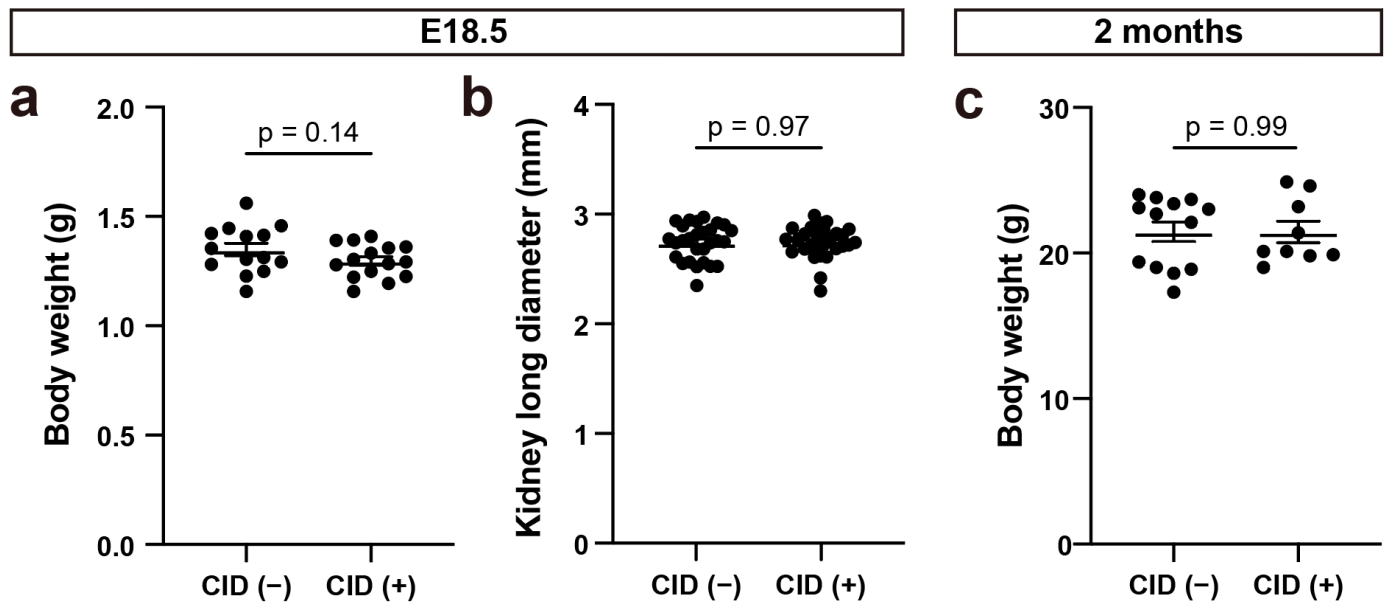

### Supplementary Fig. 2 | The effect of CID on wild-type fetuses.

**a** Body weight of E18.5 wild-type fetuses extracted by cesarean section without CID administration (CID (-)) and those after intraperitoneal administration of CID on E13.5 (CID (+)). **b** Kidney long diameter of fetuses of the CID (-) group and the CID (+) group. **c** Body weight at 2 months of age of the CID (-) group and the CID (+) group. For (a), 14 fetuses derived from 2 mothers and 15 fetuses derived from 2 mothers were analyzed for the CID (-) and CID (+) group, respectively. For (b), 28 and 30 kidneys from these fetuses were analyzed in the CID (-) and CID (+) group, respectively. For (c), 13 fetuses derived from 2 mothers and 9 fetuses derived from 2 mothers were analyzed for the CID (-) and CID (+) group, respectively. The data are presented as mean  $\pm$  SEM. Statistical analysis was performed using a two-tailed unpaired *t*-test. Source data are provided as a Source Data file. CID, chemical inducer of dimerization.



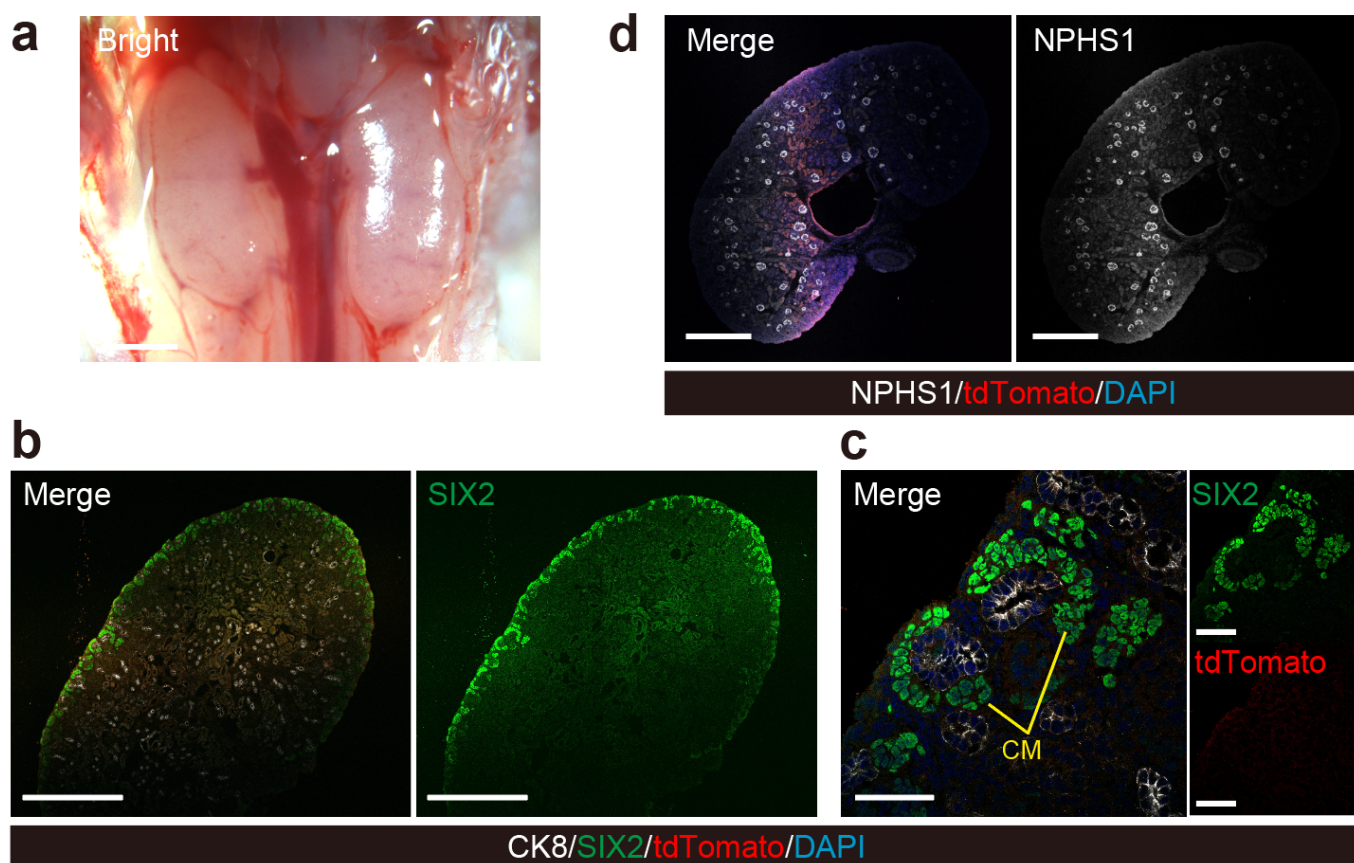

### Supplementary Fig. 3 | Neonatal wild-type mice kidneys.

**a** A stereomicroscopic image of P0.5 neonatal wild-type kidneys. Scale bar, 1 mm. **b** Immunostaining images of (a) for *SIX2*<sup>+</sup>/*tdTomato*<sup>-</sup> NPCs surrounding CK8<sup>+</sup> ureteric buds. Scale bars, 500  $\mu$ m. **c** Magnified images of (b). Scale bars, 50  $\mu$ m. **d** Immunostaining images of (a) for NPHS1<sup>+</sup> mature glomeruli. Scale bars, 500  $\mu$ m. CK8, cytokeratin 8; CM, cap mesenchyme.

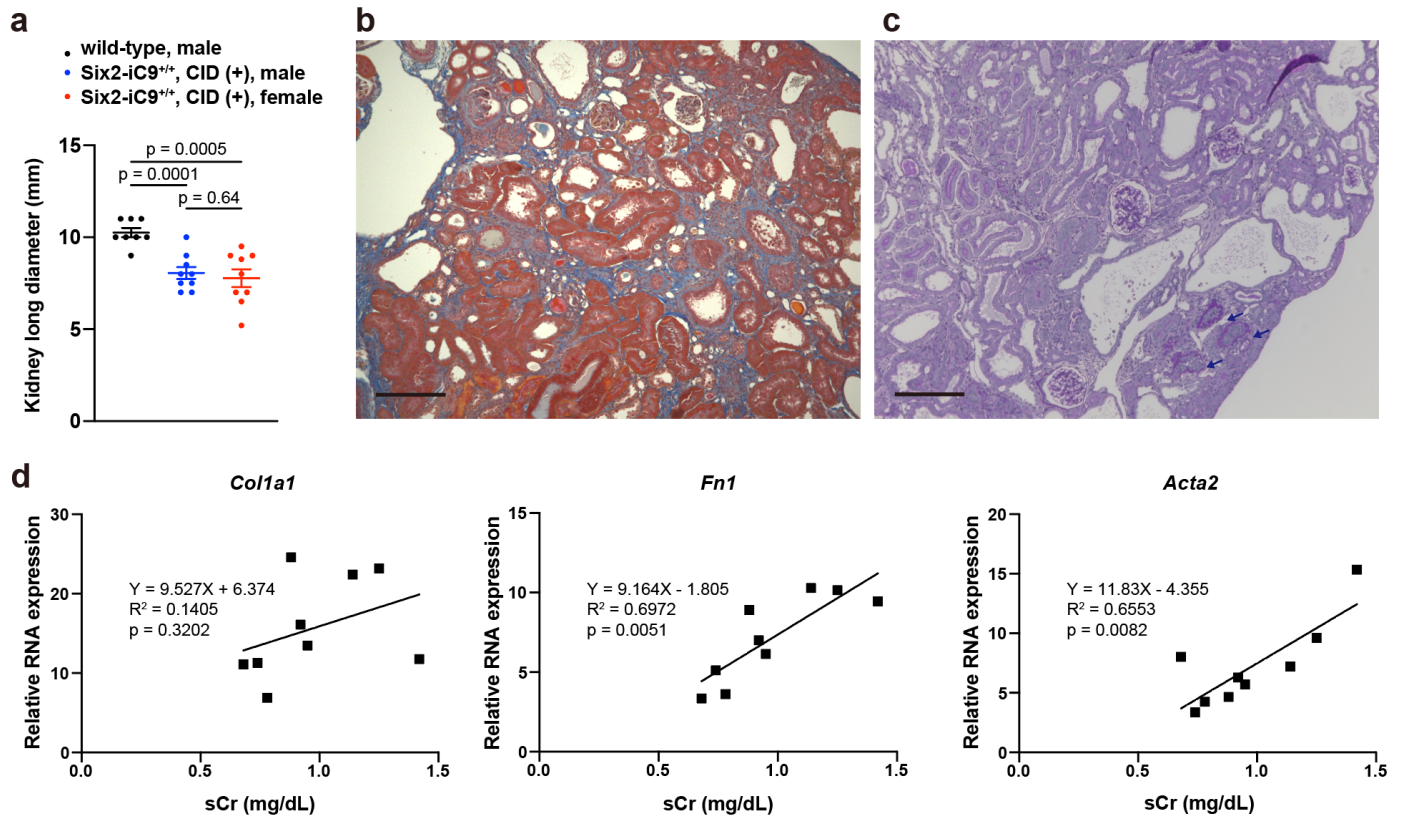

**Supplementary Fig. 4 | Analysis of a chronic kidney disease model by CID administration during a fetal period.** **a** Long diameter of right kidneys of male wild-type, male and female Six2-iC9<sup>+/+</sup> administered CID on E13.5 at 2 months of age. The data were analyzed using 8 male wild-type, 9 male Six2-iC9<sup>+/+</sup>, and 9 female Six2-iC9<sup>+/+</sup> individuals and are presented as mean  $\pm$  SEM. **b**, **c** Masson's trichrome staining (**b**) and periodic acid-schiff staining (**c**) of kidneys at 2 months of age of male Six2-iC9<sup>+/+</sup> mice administered CID on E13.5. Blue arrows in (**c**) indicate atrophic tubules. Scale bars, 200  $\mu$ m. **d** Correlation of relative RNA expression of *Col1a1*, *Fn1*, and *Acta2* with sCr levels in male Six2-iC9<sup>+/+</sup> administered CID on E13.5 at 2 months of age. Linear regression analysis was performed using 9 male Six2-iC9<sup>+/+</sup> individuals and is shown with equations,  $R^2$  values, and  $p$ -values provided in each plot. Source data are provided as a Source Data file. *Acta2*, actin alpha 2, smooth muscle; *Col1a1*, collagen type I alpha 1 chain; *Fn1*, fibronectin 1; sCr, serum creatinine.

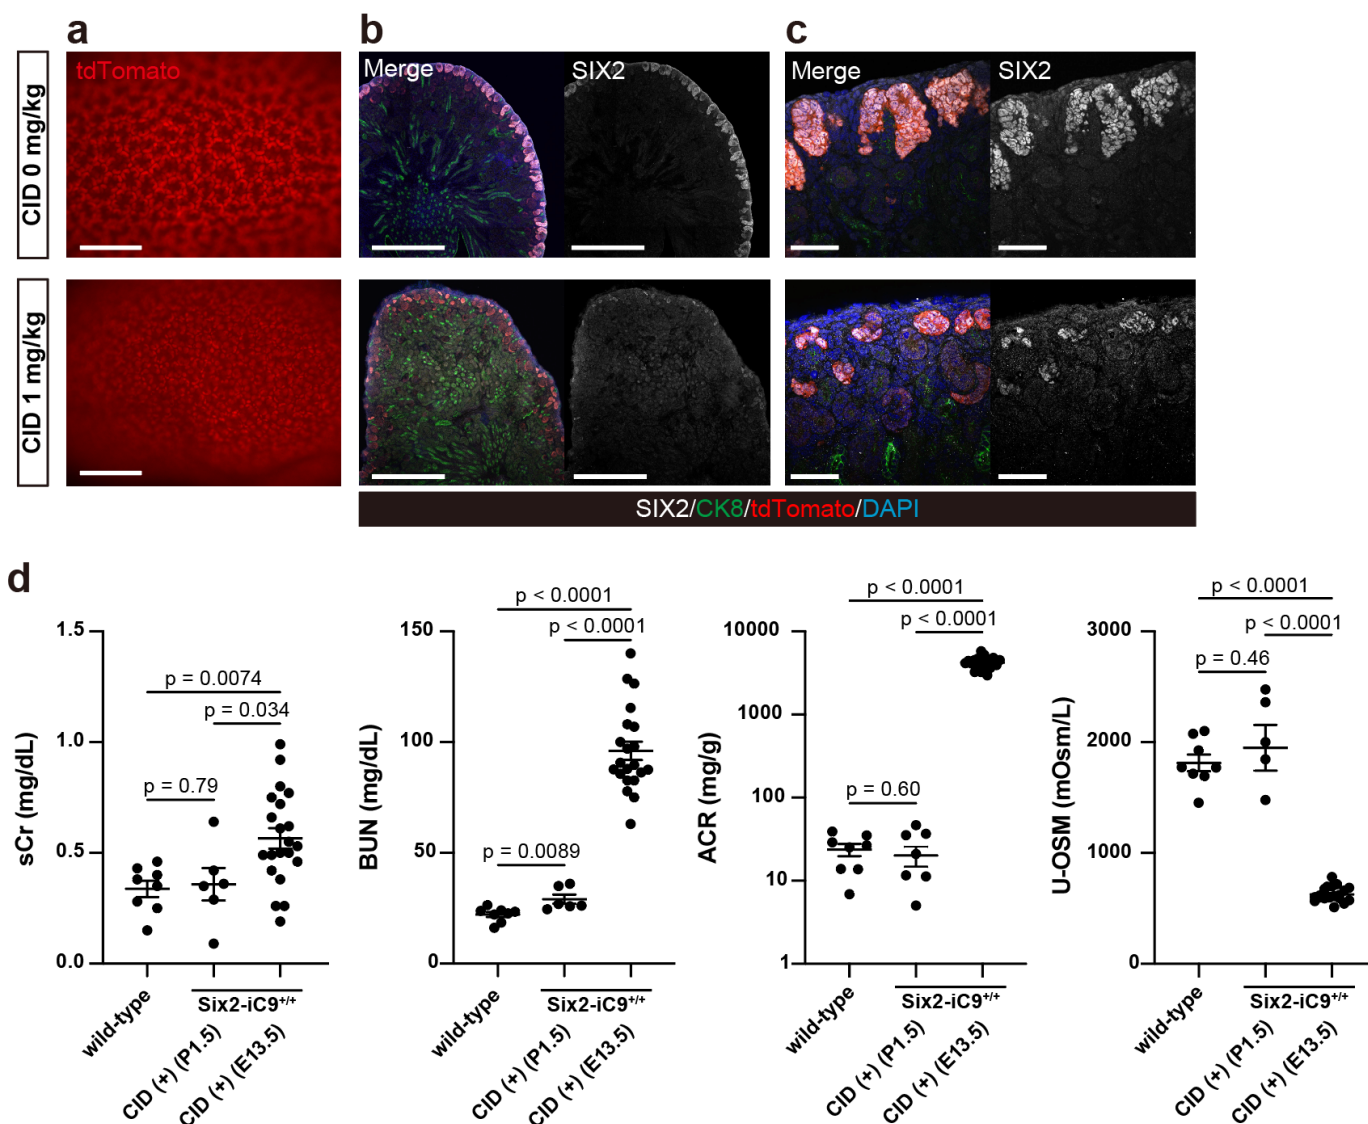

### Supplementary Fig. 5 | NPC ablation in homozygous neonatal kidneys.

**a** Fluorescence stereomicroscopic images of P2.5 neonatal *Six2-iC9<sup>+/+</sup>* kidneys without drug administration or 1 day after subcutaneous administration of 1 mg/kg CID on P1.5. Scale bars, 500  $\mu$ m. **b** Frozen section immunostaining images of (a). Scale bars, 500  $\mu$ m. **c** Magnified images of (b). Scale bars, 50  $\mu$ m. **d** Serum creatinine (sCr), blood urea nitrogen (BUN), urinary albumin/creatinine ratio (ACR), and urinary osmolality (U-OSM) in *Six2-iC9<sup>+/+</sup>* mice of both sexes treated with CID on P1.5 or E13.5 at 1 month of age, compared with those of male wild-type mice. The data were analyzed using 9 wild-type mice, 6 *Six2-iC9<sup>+/+</sup>* mice treated on P1.5, and 21 *Six2-iC9<sup>+/+</sup>* mice treated on E13.5, and are presented as mean  $\pm$  SEM. Source data are provided as a Source Data file. CID, chemical inducer of dimerization; CK8, cytokeratin 8.

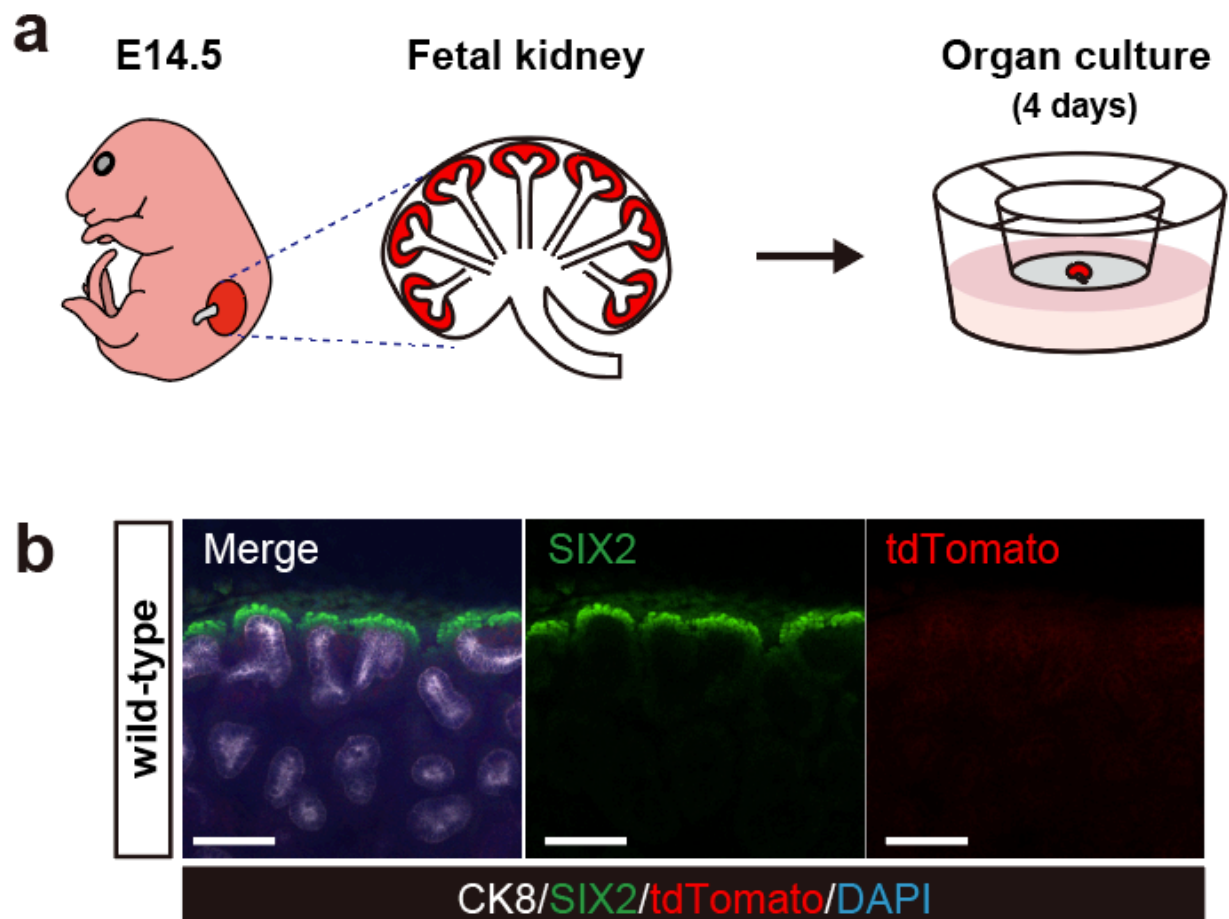

**Supplementary Fig. 6 | Fetal mice kidney culture on the air–liquid interface.**

**a** A schematic illustrating the culture of embryonic day 14.5 (E14.5) fetal kidneys on the air–liquid interface. **b** Whole-mount immunostaining images of fetal wild-type kidneys cultured for 4 days. Scale bars, 100  $\mu$ m. CK8, cytokeratin 8.



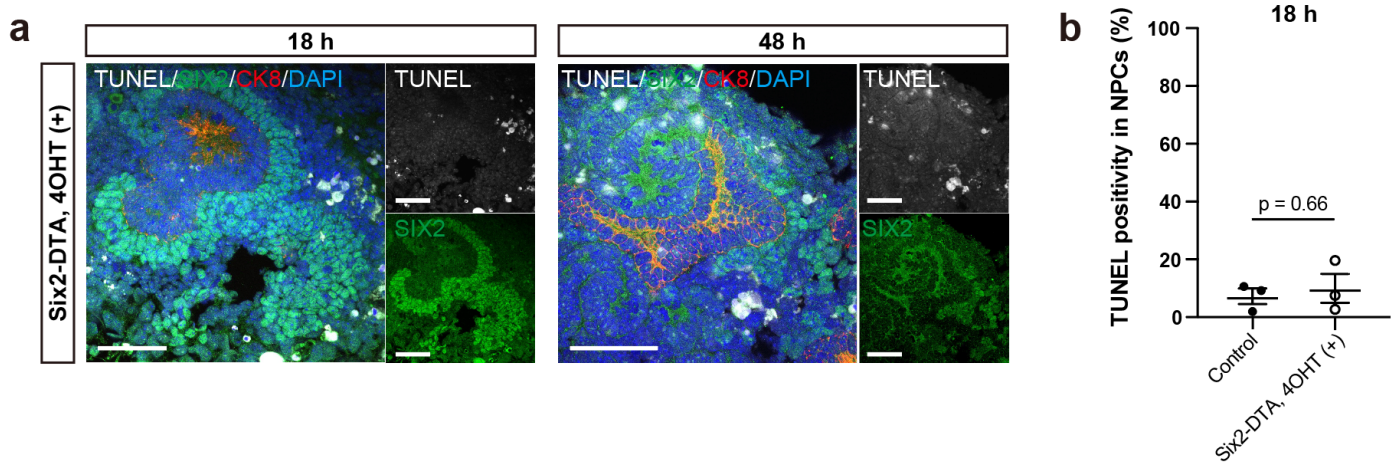

### Supplementary Fig. 7 | Slow apoptosis induction in Six2-DTA mice.

**a** Frozen section images of TUNEL staining along with immunostaining for SIX2<sup>+</sup> NPCs and CK8<sup>+</sup> ureteric buds of fetal Six2-DTA kidneys harvested 18 and 48 hours after the start of culture with 2 µg/mL 4OHT. Scale bars, 50 µm. **b** The percentage of NPCs under apoptosis (TUNEL<sup>+</sup>/SIX2<sup>+</sup>/DAPI<sup>+</sup>) in NPCs (SIX2<sup>+</sup>/DAPI<sup>+</sup>) in fetal Six2-DTA kidneys at 18 hours compared to controls (fetal Six2-iC9<sup>+/+</sup> kidneys cultured without CID). Data were analyzed using 3 biologically independent samples and are presented as mean ± SEM. Statistical analysis was performed using a two-tailed unpaired *t*-test. Source data are provided as a Source Data file. 4OHT, 4-hydroxytamoxifen; CID, chemical inducer of dimerization; CK8, cytokeratin 8; TUNEL, terminal deoxynucleotidyl transferase dUTP nick end labelling.

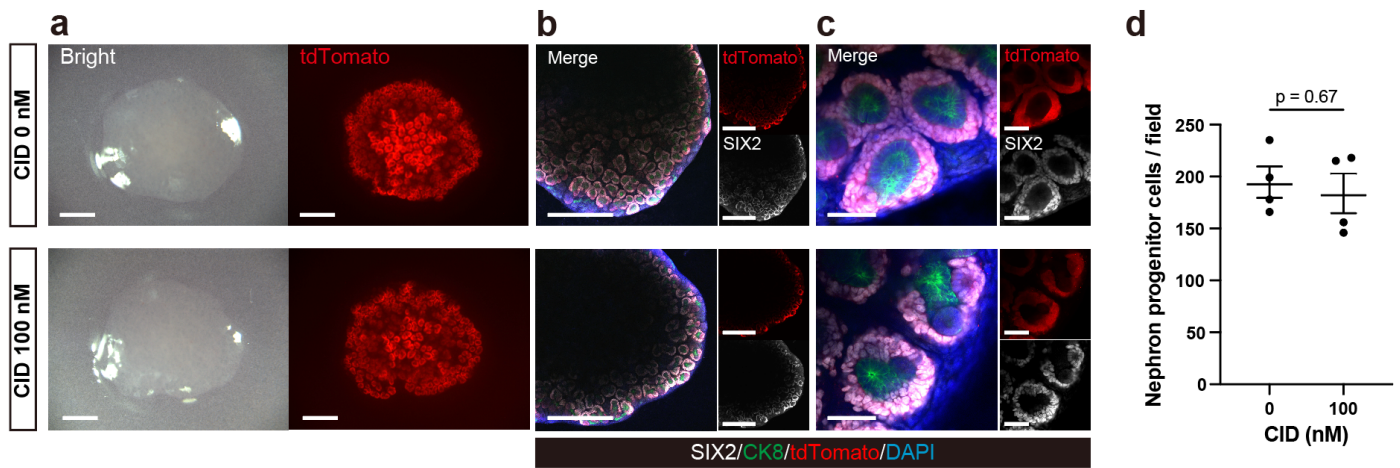

### Supplementary Fig. 8 | Ineffective NPC ablation with CID in fetal heterozygous kidneys.

**a** Fluorescence stereomicroscopic images of fetal *Six2*-iC9<sup>+/-</sup> kidneys cultured without CID and with 100 nM CID for 4 days on the air–liquid interface, showing tdTomato<sup>+</sup> NPCs. Scale bars, 500  $\mu$ m. **b** Whole-mount immunostaining images of (a), showing SIX2<sup>+</sup>/tdTomato<sup>+</sup> NPCs surrounding CK8<sup>+</sup> ureteric buds. Scale bars, 500  $\mu$ m. **c** Magnified images of (b). Scale bars, 50  $\mu$ m. **d** The number of NPCs per field after 4 days of culture with CID treatment. Data were analyzed using 4 biologically independent samples and are presented as mean  $\pm$  SEM. Statistical analysis was performed using a two-tailed unpaired *t*-test. Source data are provided as a Source Data file. CID, chemical inducer of dimerization; CK8, cytokeratin 8.

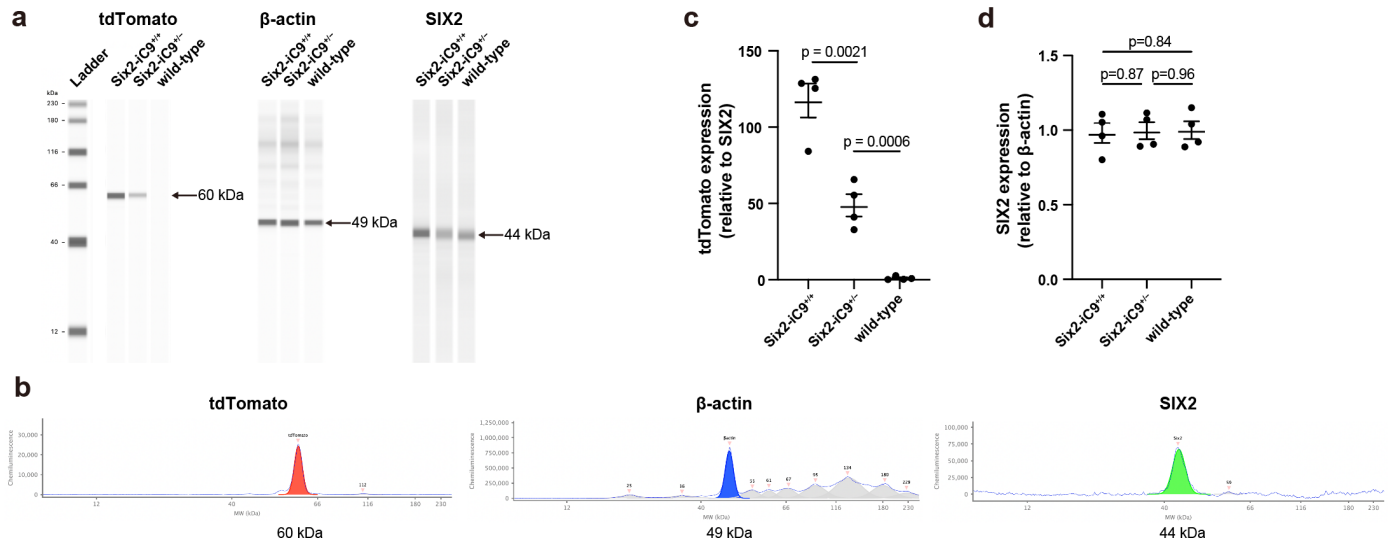

### Supplementary Fig. 9 | Evaluation of protein expression levels of using capillary Western immunoassay.

**a** Lane view of Wes for tdTomato,  $\beta$ -actin, and SIX2. **b** Representative graph images of Wes for tdTomato,  $\beta$ -actin, and SIX2. **c** Relative expression levels of SIX2 compared to  $\beta$ -actin in kidneys of fetal Six2-IC9<sup>+/+</sup>, Six2-IC9<sup>+/-</sup>, and wild type mice. **d** Relative expression levels of tdTomato compared to SIX2 in kidneys of fetal Six2-IC9<sup>+/+</sup>, Six2-IC9<sup>+/-</sup>, and wild type mice. Data were analyzed using 4 biologically independent samples and are presented as mean  $\pm$  SEM. Statistical analysis was performed using a two-tailed unpaired *t*-test. Source data are provided as a Source Data file.

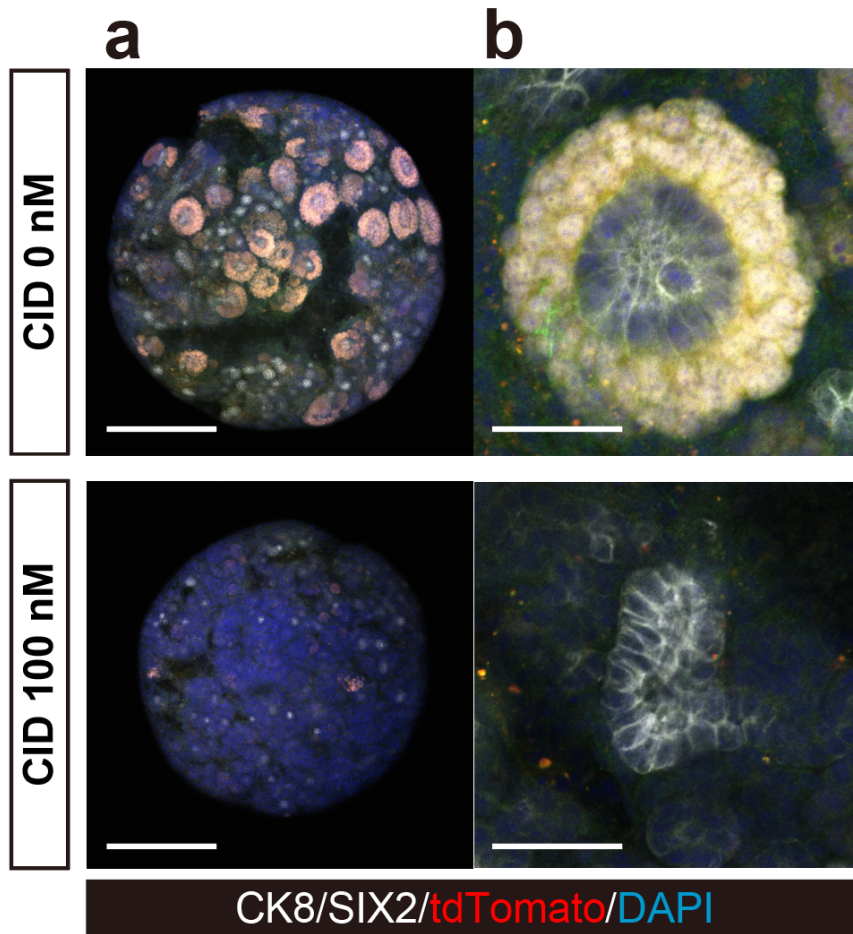

**Supplementary Fig. 10 | Cell ablation induction in dissociated and re-aggregated fetal *Six2-iC9<sup>+/+</sup>* kidney cell spheres.**

**a** Whole-mount immunostaining images of fetal *Six2-iC9<sup>+/+</sup>* kidney cell spheres cultured for 4 days without CID or with 100 nM CID added from the point of re-aggregation, showing *SIX2<sup>+</sup>/tdTomato<sup>+</sup>* NPCs surrounding *CK8<sup>+</sup>* ureteric buds. Scale bars, 200  $\mu$ m. **b** Magnified images of (a). Scale bars, 50  $\mu$ m. CID, chemical inducer of dimerization; CK8, cytokeratin 8.



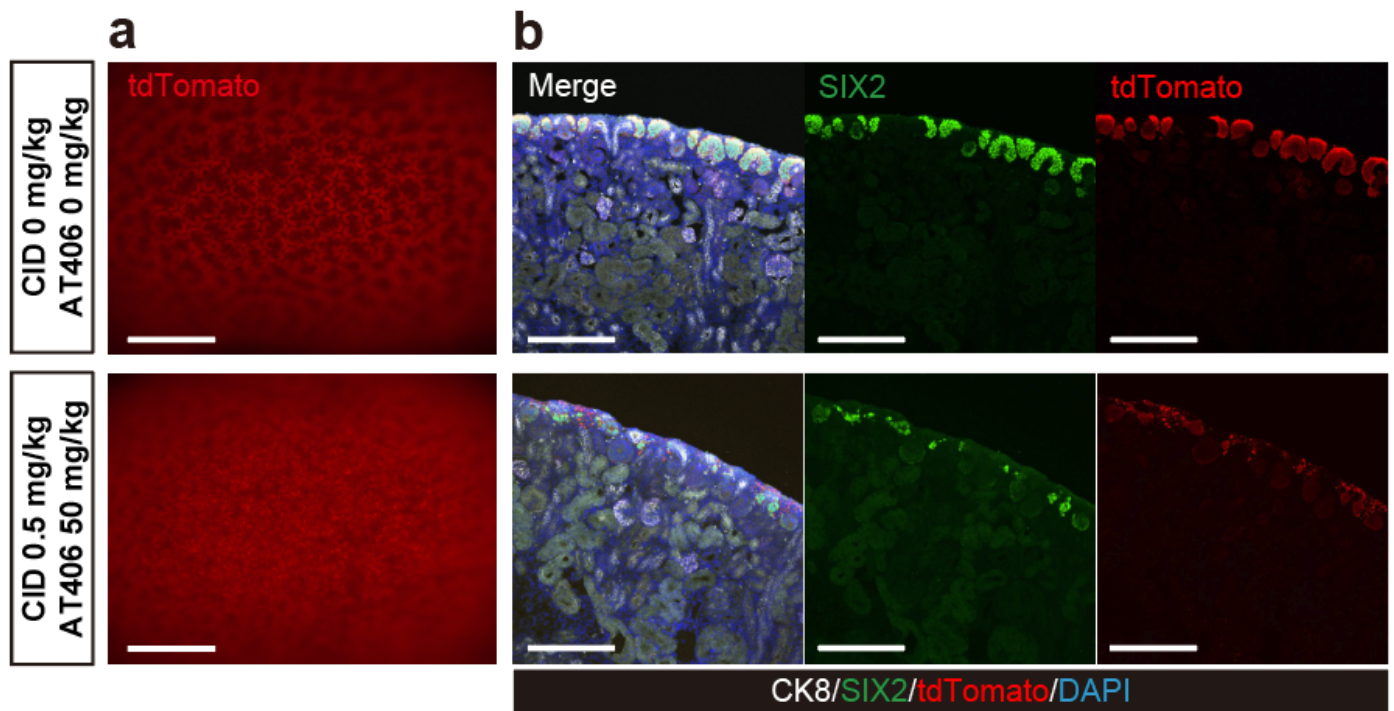

**Supplementary Fig. 11 | NPC ablation in heterozygous neonatal kidneys by co-administration of XIAP inhibitor and CID.**

**a** Fluorescence stereomicroscopic images of P2.5 neonatal *Six2-iC9<sup>+/-</sup>* kidneys without drug administration or 1 day after subcutaneous administration of 0.5 mg/kg CID and 50 mg/kg AT406 on P1.5. Scale bars, 500  $\mu$ m. **b** Frozen section immunostaining images of (a), showing *SIX2<sup>+</sup>/tdTomato<sup>+</sup>* NPCs. Scale bars, 200  $\mu$ m. CID, chemical inducer of dimerization; CK8, cytokeratin 8.

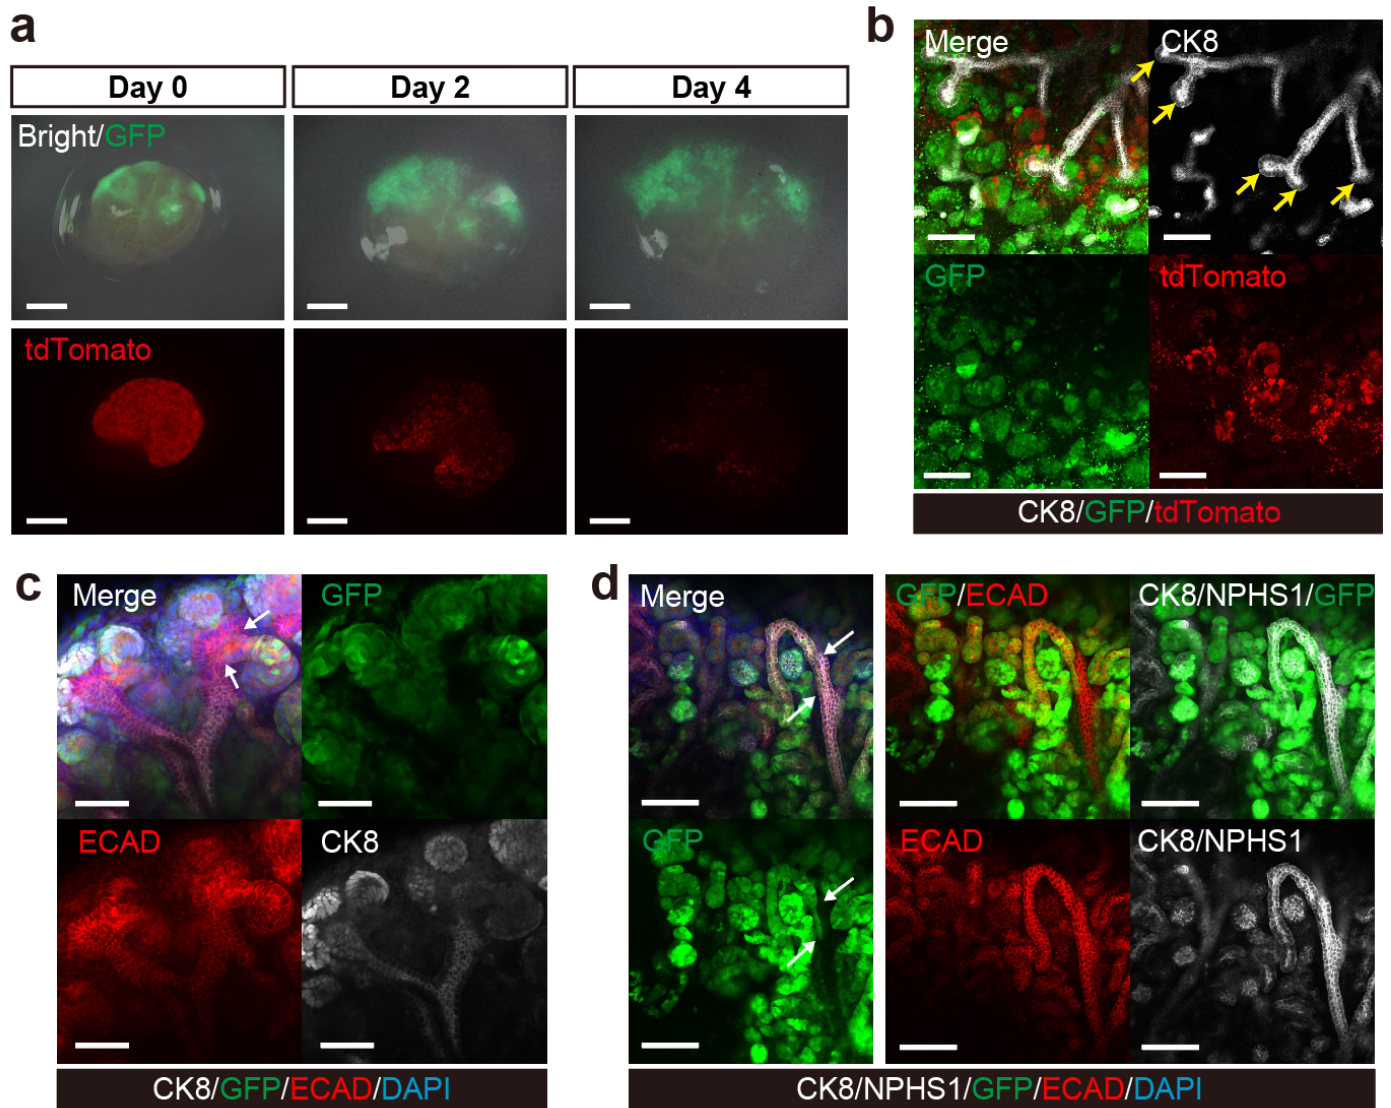

**Supplementary Fig. 12 | Replacement and maturation of nephron progenitor cells using fetal Six2-iC9 kidneys as a scaffold.**

**a** Fluorescence stereomicroscopic images of fetal Six2-iC9<sup>+/+</sup> kidneys with rat RPC injection, cultured with 100 nM CID for 4 days on the air–liquid interface, showing tdTomato<sup>+</sup> host NPCs and GFP<sup>+</sup> donor RPCs. Scale bars, 500  $\mu$ m. **b–d** Whole-mount immunostaining images of Six2-iC9<sup>+/-</sup> kidneys with mouse RPC injection cultured with 100 nM CID and 10  $\mu$ M AT406 for 4 days (**b, c**) and 7 days (**d**). Yellow arrows in (**b**) represent branching CK8<sup>+</sup>/GFP<sup>-</sup> host ureteric bud tips surrounded by GFP<sup>+</sup> donor NPCs. White arrows in (**c, d**) indicate the connecting points between ECAD<sup>+</sup>/GFP<sup>+</sup> donor distal tubules and CK8<sup>+</sup>/GFP<sup>-</sup> host collecting ducts. Scale bars, 100  $\mu$ m. CK8, cytokeratin 8; ECAD, E-cadherin; GFP, green fluorescent protein.

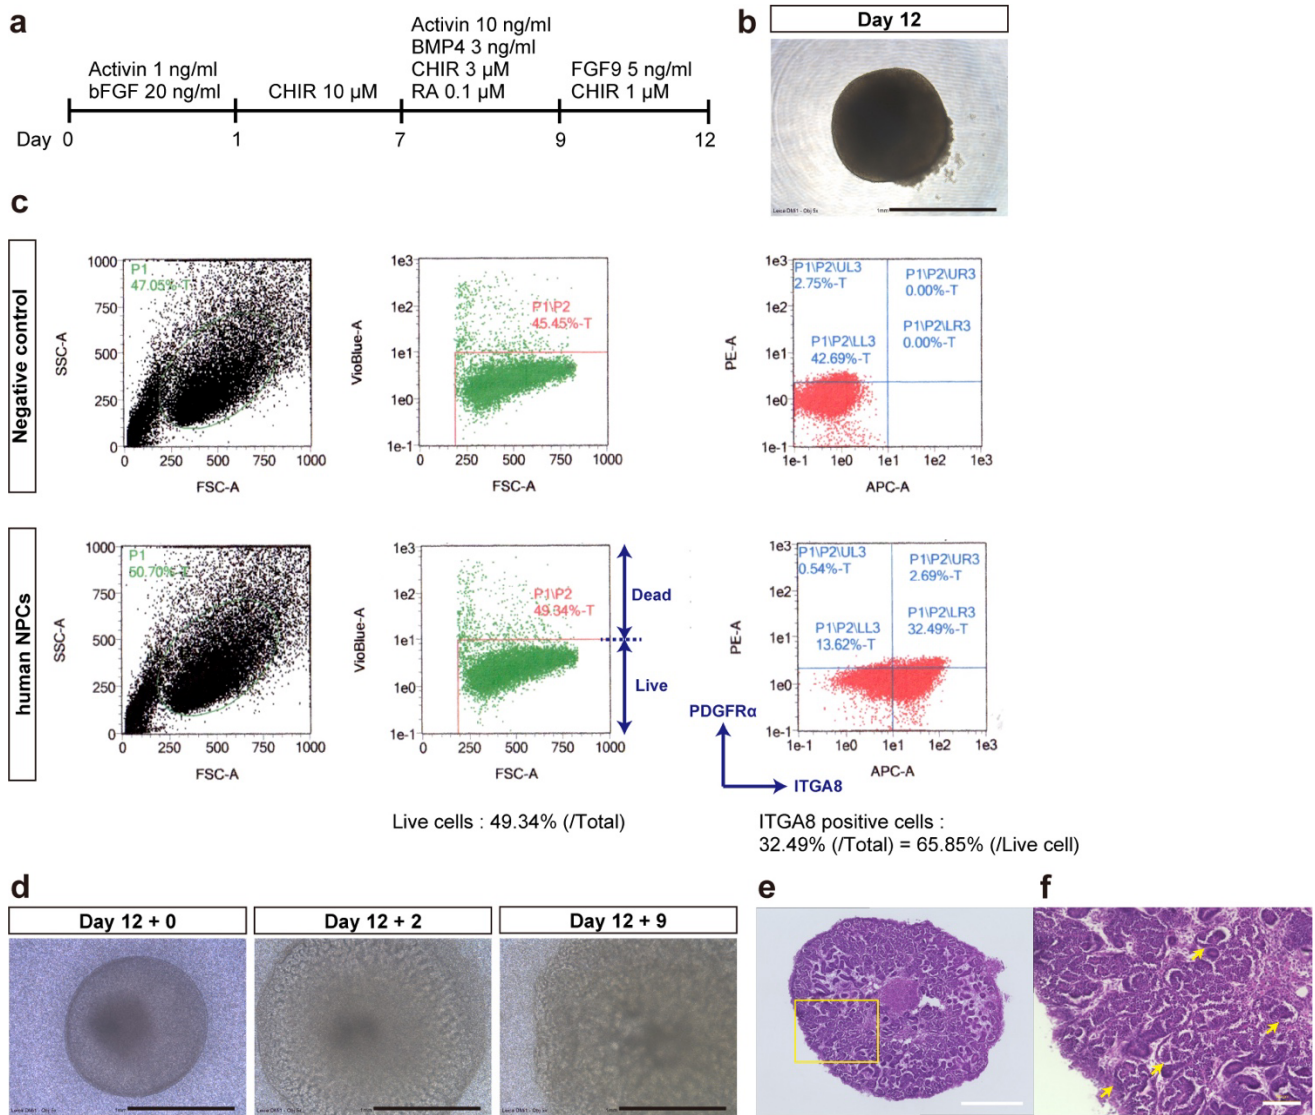

### Supplementary Fig. 13 | Purity and differentiation capacity of induced human NPCs.

**a** A schematic illustrating the protocol for inducing nephron progenitor cells (NPCs) from human induced pluripotent stem cells (hiPSCs). **b** Microscopic images of NPC spheres on day 12. Scale bars, 1 mm. **c** Representative images of the flow cytometric analysis of NPC spheres. **d** Microscopic images of human NPC spheres cultured on the air–liquid interface for 9 days. Scale bars, 1 mm. **e** Hematoxylin and eosin-stained section of (c). Scale bars, 500  $\mu$ m. **f** A magnified image of the yellow square of (e). Yellow arrows indicate glomeruli. Scale bars, 100  $\mu$ m. ITGA8, integrin subunit alpha 8; PDGFR $\alpha$ , platelet-derived growth factor receptor alpha.



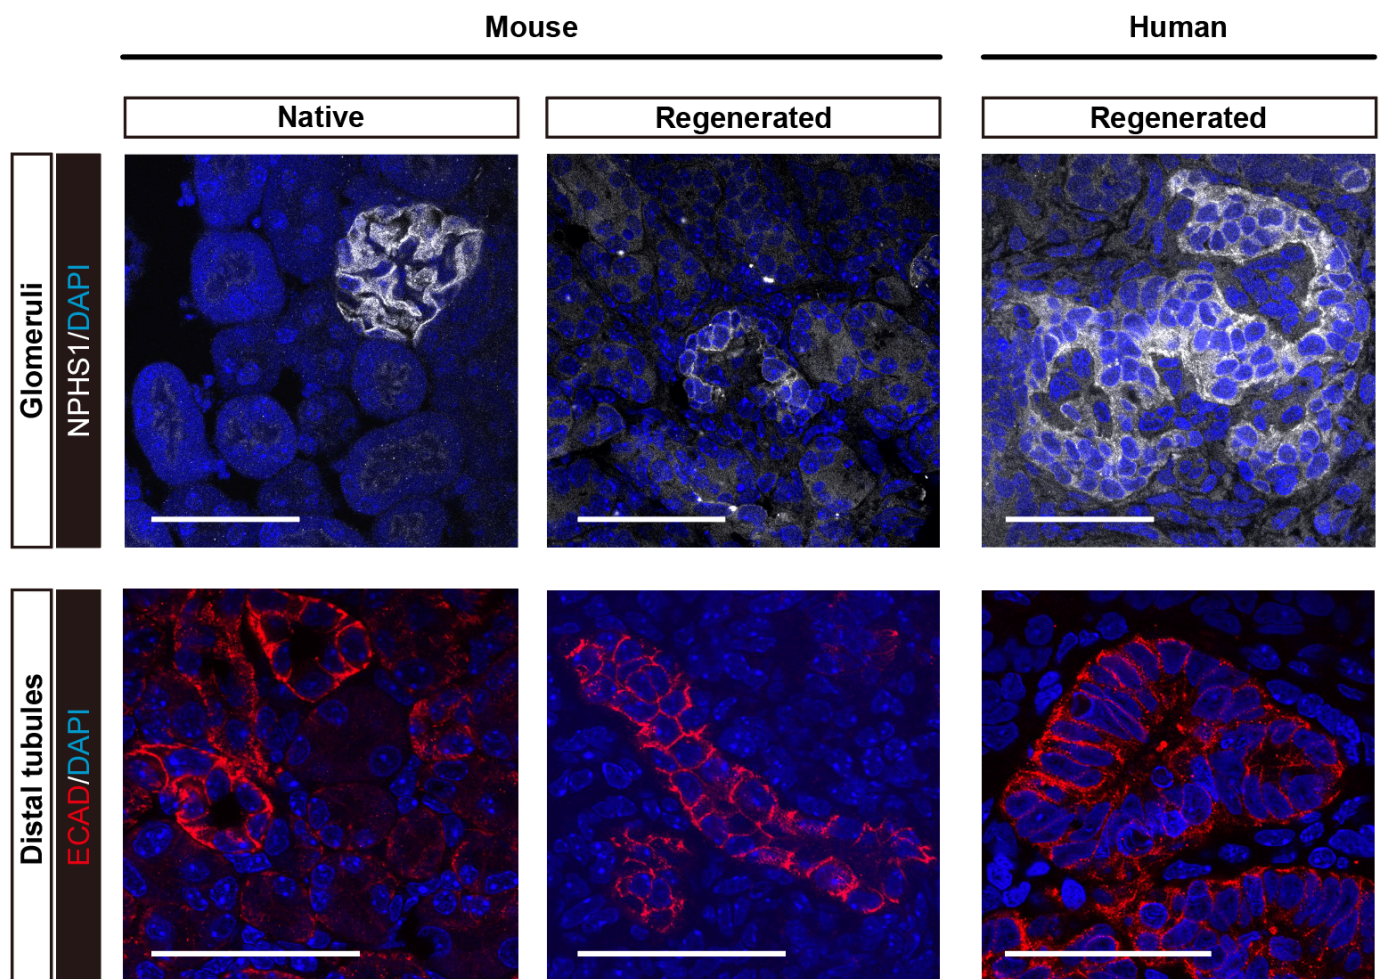

**Supplementary Fig. 14 | Comparison of the size of regenerated nephrons between humans and mice.**

Glomeruli (NPHS1<sup>+</sup>) and distal tubules (ECAD<sup>+</sup>) of (1) native kidneys harvested from 2-month-old mice (left), (2) *in vivo* regenerated mouse nephrons in fetal wild-type mouse kidneys collected after 7 days following transplantation into NOG mice (middle), and (3) *in vivo* regenerated human nephrons in fetal Six2-iC9<sup>+/+</sup> kidneys, following the injection of human NPCs, which were cultured for 3 days, transplanted into NOG mice, and collected after 7 days (right). Scale bars, 50  $\mu$ m. ECAD, E-cadherin.

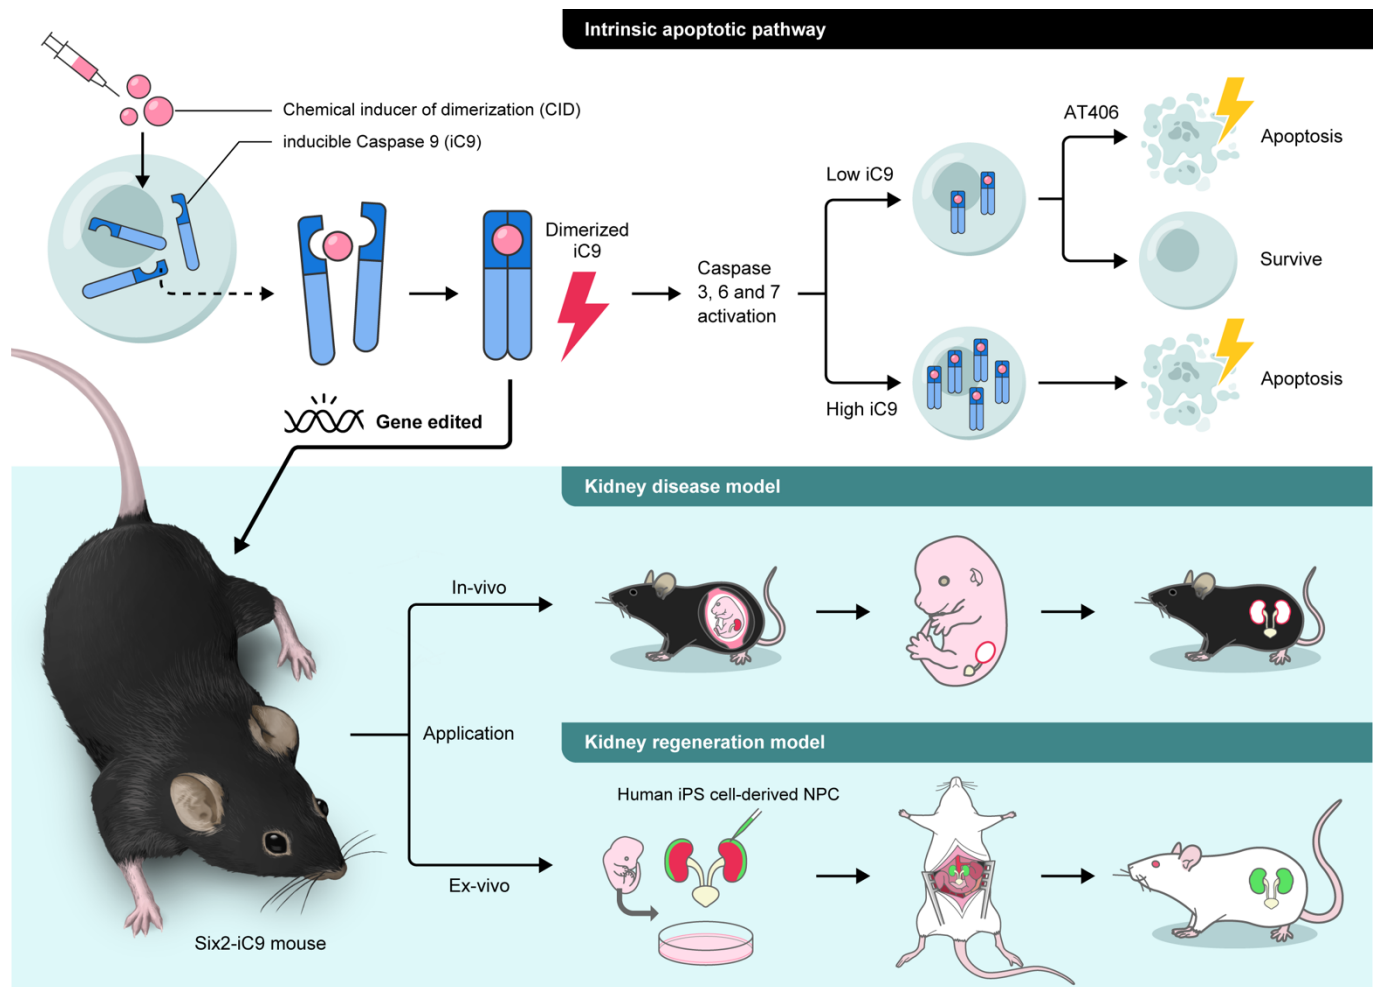

### Supplementary Fig. 15 | A schematic illustrating this study.

The figure illustrates the inducible Caspase 9 (iC9)-mediated apoptosis system, where chemical inducer of dimerization (CID) induces iC9 dimerization, activating the intrinsic apoptotic pathway and enabling targeted cell ablation. High iC9 expression is required to induce apoptosis; however, apoptosis can also be triggered with low iC9 expression through the co-administration of AT406, an inhibitor of X-linked inhibitor of apoptosis protein. The Six2-iC9 mouse model enables controlled apoptosis in nephron progenitor cells (NPCs), allowing various applications: disease modeling with adjustable nephron loss, ranging from congenital kidney deficiency to severe chronic kidney disease in viable animals, and a scaffold for human–mouse chimeric kidney regeneration, using human induced pluripotent stem cells (iPSCs)-derived NPCs. *This figure was created by LAIMAN, Inc.*

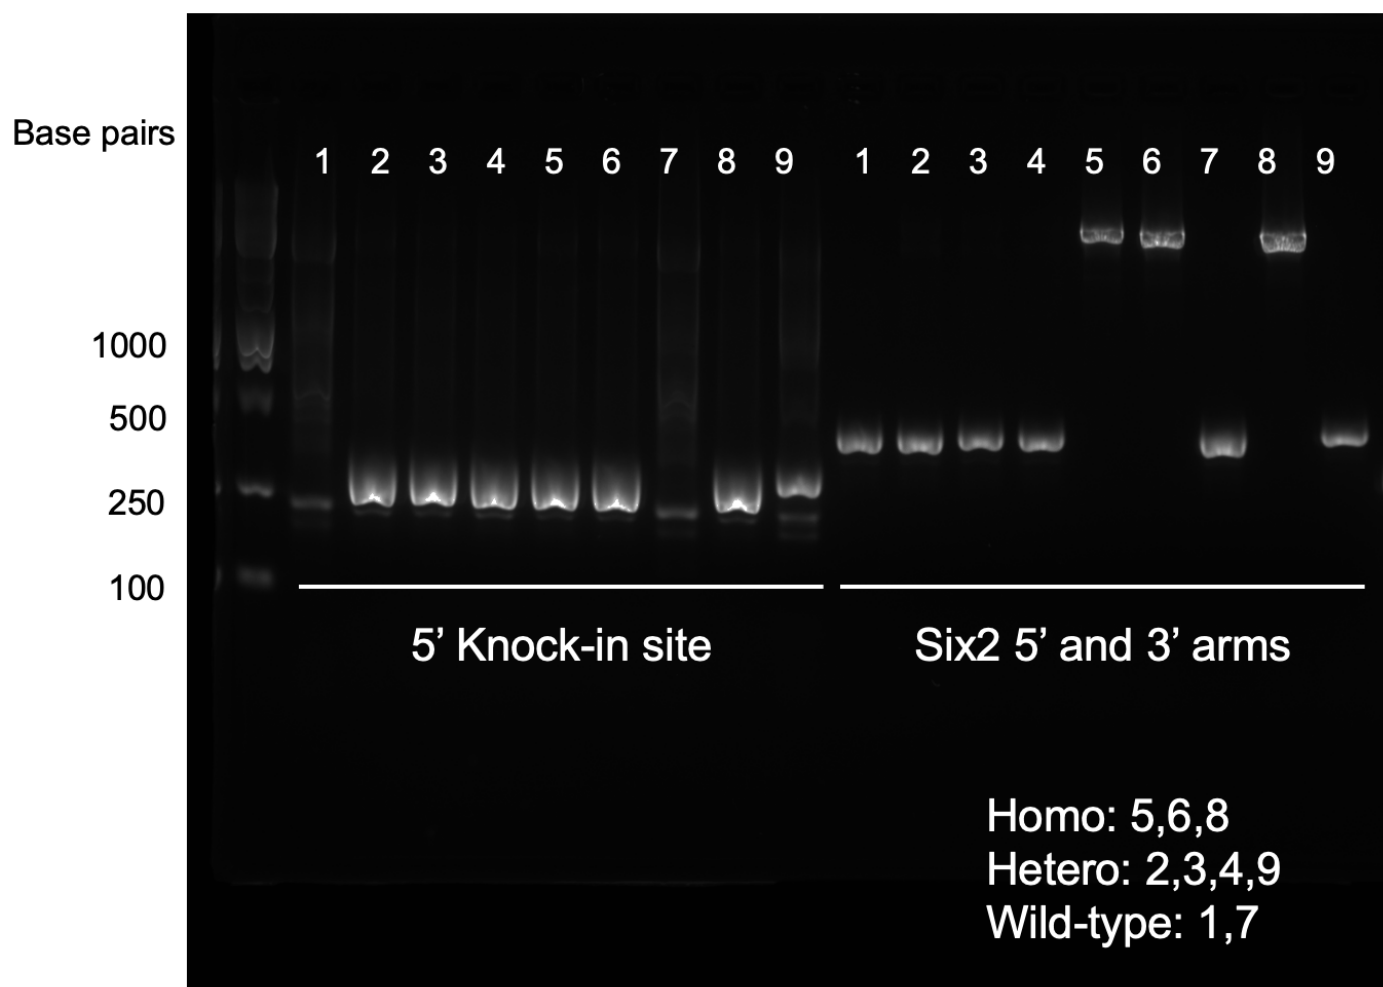

**Supplementary Fig. 16 | An uncropped scan of all blots in Supplementary Fig. 1c.**

**Supplementary Table 1 | The primer sequences for genomic PCR.**

| Primers             | Primer sequences                                                | Products                |                         |           |
|---------------------|-----------------------------------------------------------------|-------------------------|-------------------------|-----------|
|                     |                                                                 | Six2-iC9 <sup>+/+</sup> | Six2-iC9 <sup>+/-</sup> | Wild type |
| Six2 5' and 3' arms | Forward: gcagttccgaggatgagaag<br>Reverse: caaaggataccgagcagacc  | 3200 bp                 | 420 bp                  | 420 bp    |
| 5' knock-in site    | Forward: tgcagcatcaccacagcctgc<br>Reverse: ctcggatcacctcctgcttg | 318 bp                  | 318 bp                  | null      |

**Supplementary Table 2 | List of primary antibodies for immunostaining.**

| Antibodies    | Source                    | Identifier        | Host         | Dilution |
|---------------|---------------------------|-------------------|--------------|----------|
| CK8 (TROMA-I) | DSHB                      | N/A               | Rat          | 1:100    |
| SIX2          | Proteintech               | Cat. # 11562-1-AP | Rabbit       | 1:100    |
| tdTomato      | MyBioSource               | Cat. # MBS448122  | Goat         | 1:100    |
| NPHS1         | Progen                    | Cat. # GP-N2      | Guinea pig   | 1:100    |
| ECAD          | Cell Signaling Technology | Cat. # 3195S      | Rabbit       | 1:100    |
| IBA1          | Novus Biologicals         | Cat. # NB100-1028 | Goat         | 1:100    |
| GFP           | Abcam                     | Cat. # ab13970    | Chicken      | 1:200    |
| LTL           | Vector                    | Cat. # B-1325     | Biotinylated | 1:200    |
| TFAP2B        | Proteintech               | Cat. #13183-1-AP  | Rabbit       | 1:100    |
| CD31          | R&D systems               | Cat. # AF3628     | Goat         | 1:100    |

CK8, cytokeratin 8; ECAD, E-cadherin; GFP, green fluorescent protein; IBA1, Ionized calcium binding adaptor molecule 1; LTL, lotus tetragonolobus lectin; TFAP2B, transcription factor AP-2 beta.

**Supplementary Table 3 | List of primary antibodies for capillary Western immunoassay.**

| Antibodies | Source                    | Identifier        | Host   | Dilution | Target size (kDa) |
|------------|---------------------------|-------------------|--------|----------|-------------------|
| tdTomato   | Cell Signaling Technology | Cat. # 20163S     | Rabbit | 1:10     | 60                |
| β-actin    | Cell Signaling Technology | Cat. # 3700S      | Mouse  | 1:50     | 49                |
| SIX2       | Proteintech               | Cat. # 11562-1-AP | Rabbit | 1:50     | 44                |

**Supplementary Table 4 | List of TaqMan Gene Expression Assays for RT-qPCR.**

| Gene Name            | Source                   | Identifier           |
|----------------------|--------------------------|----------------------|
| <i>Gapdh</i>         | Thermo Fisher Scientific | Cat. # Mm99999915_g1 |
| <i fn1<="" i=""></i> | Thermo Fisher Scientific | Cat. # Mm01256744_m1 |
| <i>Acta2</i>         | Thermo Fisher Scientific | Cat. # Mm00725412_s1 |
| <i>Col1a1</i>        | Thermo Fisher Scientific | Cat. # Mm00801666_g1 |

*Acta2*, actin alpha 2, smooth muscle; *Col1a1*, collagen type I alpha 1 chain; *Fn1*, fibronectin 1.
